# Supplementary material
Source: PubMed Central journal article supplement (PMC6580704)
Supplement: MCB.00020-19-s0001.pdf [file MCB.00020-19-s0001.pdf]

**Table S1.** 241 GFI1B proximitome candidates sorted by intensity

|    | Gene                | P value <sup>a</sup> | Fold change <sup>b</sup> | Average GFI1B-BirA* reads |           | Average BirA* reads |           |
|----|---------------------|----------------------|--------------------------|---------------------------|-----------|---------------------|-----------|
|    |                     |                      |                          | Total ( $\pm$ SD)         | Intensity | Total ( $\pm$ SD)   | Intensity |
| 1  | KDM1A <sup>c</sup>  | 3.6E-19              | 10.0                     | 141.3 ( $\pm$ 7.6)        | 4.6E+09   | 31.3 ( $\pm$ 5.7)   | 4.6E+08   |
| 2  | MKI67               | 3.8E-02              | 1.5                      | 338.3 ( $\pm$ 11.7)       | 4.0E+09   | 177 ( $\pm$ 32.9)   | 2.7E+09   |
| 3  | RCOR1 <sup>c</sup>  | 7.8E-16              | 11.1                     | 97.3 ( $\pm$ 3.5)         | 3.0E+09   | 25.7 ( $\pm$ 1.5)   | 2.7E+08   |
| 4  | GSE1 <sup>c</sup>   | 2.1E-08              | 9.0                      | 137.3 ( $\pm$ 8.7)        | 3.0E+09   | 32 ( $\pm$ 5.3)     | 3.3E+08   |
| 5  | HSPD1               | 4.0E-04              | 2.0                      | 96.7 ( $\pm$ 6.4)         | 1.6E+09   | 66.7 ( $\pm$ 7.4)   | 8.0E+08   |
| 6  | HNRNPH1             | 4.9E-02              | 1.3                      | 40 ( $\pm$ 5.6)           | 1.4E+09   | 35.3 ( $\pm$ 5.5)   | 1.1E+09   |
| 7  | GFI1B               | 5.0E-29              | 141.7                    | 29 ( $\pm$ 9.6)           | 1.1E+09   | 2.7 ( $\pm$ 0.6)    | 7.4E+06   |
| 8  | TOP2A               | 3.6E-02              | 1.4                      | 107.3 ( $\pm$ 4)          | 9.5E+08   | 58 ( $\pm$ 14.7)    | 6.9E+08   |
| 9  | SMARCA5             | 1.3E-02              | 1.4                      | 54.3 ( $\pm$ 4)           | 5.6E+08   | 31 ( $\pm$ 3.5)     | 4.0E+08   |
| 10 | BAZ1B               | 1.9E-04              | 2.4                      | 74.3 ( $\pm$ 2.1)         | 5.1E+08   | 26.7 ( $\pm$ 6.8)   | 2.1E+08   |
| 11 | RREB1 <sup>c</sup>  | 2.2E-20              | 33.6                     | 67.7 ( $\pm$ 2.1)         | 4.8E+08   | 5.7 ( $\pm$ 2.9)    | 1.4E+07   |
| 12 | HMG20B <sup>c</sup> | 2.3E-09              | 7.8                      | 20.7 ( $\pm$ 1.5)         | 4.4E+08   | 9.3 ( $\pm$ 1.2)    | 5.6E+07   |
| 13 | HMG20A <sup>c</sup> | 6.8E-04              | 3.9                      | 27.7 ( $\pm$ 1.2)         | 4.4E+08   | 7.7 ( $\pm$ 2.5)    | 1.1E+08   |
| 14 | BCOR                | 1.7E-04              | 3.4                      | 77 ( $\pm$ 4)             | 4.3E+08   | 25 ( $\pm$ 5)       | 1.3E+08   |
| 15 | CHD4                | 5.8E-03              | 1.8                      | 79.3 ( $\pm$ 2.1)         | 4.2E+08   | 43 ( $\pm$ 11.1)    | 2.4E+08   |
| 16 | HDAC1 <sup>c</sup>  | 4.6E-03              | 3.6                      | 37 ( $\pm$ 2)             | 3.9E+08   | 23.3 ( $\pm$ 7.2)   | 1.1E+08   |
| 17 | ADNP                | 4.2E-02              | 2.4                      | 58 ( $\pm$ 7.9)           | 3.1E+08   | 22.7 ( $\pm$ 5.1)   | 1.3E+08   |
| 18 | NOL6                | 3.4E-02              | 1.4                      | 49.7 ( $\pm$ 3.8)         | 3.0E+08   | 29.7 ( $\pm$ 2.5)   | 2.2E+08   |
| 19 | DLD                 | 2.3E-03              | 1.6                      | 21.3 ( $\pm$ 3.2)         | 3.0E+08   | 23 ( $\pm$ 5.3)     | 1.9E+08   |
| 20 | SMC1A               | 9.7E-09              | 3.7                      | 53.7 ( $\pm$ 5.1)         | 2.9E+08   | 14.3 ( $\pm$ 1.5)   | 7.9E+07   |
| 21 | EBNA1BP2            | 3.3E-03              | 1.7                      | 16.3 ( $\pm$ 1.2)         | 2.7E+08   | 10.3 ( $\pm$ 0.6)   | 1.6E+08   |
| 22 | PKP3                | 3.2E-03              | 2.2                      | 44.7 ( $\pm$ 2.1)         | 2.5E+08   | 18.3 ( $\pm$ 0.6)   | 1.2E+08   |
| 23 | SMC3                | 3.8E-07              | 4.2                      | 51.7 ( $\pm$ 5.1)         | 2.5E+08   | 11.7 ( $\pm$ 4.5)   | 5.9E+07   |
| 24 | ZC3H18              | 1.4E-02              | 1.4                      | 37 ( $\pm$ 4.4)           | 2.3E+08   | 17 ( $\pm$ 2.6)     | 1.7E+08   |
| 25 | MCM6                | 1.2E-02              | 1.2                      | 33.7 ( $\pm$ 2.5)         | 2.1E+08   | 20.3 ( $\pm$ 2.1)   | 1.8E+08   |
| 26 | DDX5                | 3.0E-02              | 1.7                      | 31 ( $\pm$ 5.2)           | 2.1E+08   | 13.7 ( $\pm$ 2.5)   | 1.2E+08   |
| 27 | URB1                | 9.1E-05              | 1.9                      | 42 ( $\pm$ 5.3)           | 1.9E+08   | 18.3 ( $\pm$ 2.1)   | 1.0E+08   |
| 28 | HIC2                | 4.4E-04              | 2.3                      | 17.3 ( $\pm$ 0.6)         | 1.9E+08   | 7 ( $\pm$ 1.7)      | 8.4E+07   |
| 29 | RCOR3               | 4.1E-18              | 34.5                     | 31.3 ( $\pm$ 0.6)         | 1.9E+08   | 2.3 ( $\pm$ 1.5)    | 5.5E+06   |
| 30 | IPO7                | 8.7E-06              | 9.5                      | 30 ( $\pm$ 1.7)           | 1.9E+08   | 5.7 ( $\pm$ 0.6)    | 2.0E+07   |
| 31 | XRN2                | 1.3E-02              | 1.2                      | 41 ( $\pm$ 1.7)           | 1.9E+08   | 22.7 ( $\pm$ 5.5)   | 1.5E+08   |
| 32 | NCOR2               | 1.3E-05              | 8.2                      | 51.3 ( $\pm$ 4.5)         | 1.8E+08   | 5.7 ( $\pm$ 3.1)    | 2.2E+07   |
| 33 | ANKHD1              | 4.4E-02              | 1.1                      | 41 ( $\pm$ 1)             | 1.7E+08   | 24 ( $\pm$ 8.2)     | 1.5E+08   |
| 34 | AGO2                | 3.9E-02              | 1.0                      | 25.3 ( $\pm$ 3.2)         | 1.6E+08   | 17.7 ( $\pm$ 1.2)   | 1.7E+08   |
| 35 | ARID1A              | 5.4E-07              | 3.9                      | 51 ( $\pm$ 2)             | 1.5E+08   | 9.3 ( $\pm$ 2.9)    | 3.9E+07   |

|    |                     |         |      |              |         |             |         |
|----|---------------------|---------|------|--------------|---------|-------------|---------|
| 36 | BUD13               | 1.6E-02 | 1.6  | 7.3 (±0.6)   | 1.5E+08 | 2.3 (±1.2)  | 9.2E+07 |
| 37 | BLM                 | 2.0E-02 | 1.6  | 37 (±3.5)    | 1.4E+08 | 16 (±1.7)   | 9.1E+07 |
| 38 | SET                 | 2.1E-02 | 2.0  | 9 (±1.7)     | 1.4E+08 | 5.3 (±1.5)  | 7.1E+07 |
| 39 | HDAC3               | 7.6E-07 | 4.9  | 8.7 (±1.2)   | 1.4E+08 | 6.3 (±2.1)  | 2.9E+07 |
| 40 | ARID3A              | 1.1E-05 | 12.1 | 36.7 (±1.5)  | 1.4E+08 | 2.7 (±1.5)  | 1.2E+07 |
| 41 | PBRM1               | 3.4E-04 | 2.2  | 36.3 (±1.2)  | 1.4E+08 | 13.3 (±1.5) | 6.3E+07 |
| 42 | PHF21A <sup>c</sup> | 1.6E-08 | 20.0 | 26.3 (±2.5)  | 1.3E+08 | 1.3 (±0.6)  | 6.5E+06 |
| 43 | TNRC6A              | 5.7E-05 | 1.9  | 35.3 (±0.6)  | 1.3E+08 | 16.3 (±3.2) | 6.8E+07 |
| 44 | ZNF609              | 4.7E-06 | 5.3  | 28.7 (±1.5)  | 1.3E+08 | 6.3 (±1.5)  | 2.4E+07 |
| 45 | RUNX1               | 1.3E-05 | 7.3  | 18 (±1)      | 1.3E+08 | 6.3 (±0.6)  | 1.7E+07 |
| 46 | MYBBP1A             | 6.3E-03 | 1.7  | 53.3 (±2.5)  | 1.3E+08 | 17.7 (±5.5) | 7.5E+07 |
| 47 | CUX1                | 7.8E-06 | 3.7  | 23.7 (±3.8)  | 1.2E+08 | 6 (±2.6)    | 3.3E+07 |
| 48 | BIRC2               | 6.6E-03 | 2.6  | 22.7 (±1.5)  | 1.2E+08 | 12.7 (±2.1) | 4.8E+07 |
| 49 | GARS                | 1.9E-02 | 5.6  | 14 (±1)      | 1.2E+08 | 9 (±1.7)    | 2.2E+07 |
| 50 | ZNF451              | 1.0E-04 | 7.7  | 9.3 (±2.5)   | 1.2E+08 | 4.3 (±2.1)  | 1.6E+07 |
| 51 | CUX1                | 1.6E-05 | 4.5  | 27.3 (±3.1)  | 1.2E+08 | 7 (±1)      | 2.7E+07 |
| 52 | TCF12               | 3.8E-05 | 2.3  | 23.7 (±3.5)  | 1.2E+08 | 18 (±1)     | 5.3E+07 |
| 53 | USP34               | 8.9E-05 | 43.3 | 35.3 (±8.4)  | 1.2E+08 | 1.7 (±1.2)  | 2.8E+06 |
| 54 | ARID1B              | 4.9E-13 | 19.9 | 39 (±7.2)    | 1.2E+08 | 2.7 (±0.6)  | 5.8E+06 |
| 55 | OAT                 | 1.1E-02 | 1.2  | 16.3 (±0.6)  | 1.1E+08 | 12.3 (±1.5) | 9.6E+07 |
| 56 | GTPBP4              | 2.9E-02 | 2.3  | 30.3 (±3.1)  | 1.1E+08 | 10.3 (±2.1) | 4.9E+07 |
| 57 | IKZF1               | 7.0E-08 | 4.2  | 35.3 (±11.2) | 1.1E+08 | 14 (±6.1)   | 2.6E+07 |
| 58 | NOP14               | 4.8E-03 | 9.7  | 30.3 (±1.5)  | 1.1E+08 | 3 (±1)      | 1.1E+07 |
| 59 | FTSJ3               | 2.8E-02 | 2.2  | 27.7 (±0.6)  | 1.1E+08 | 13.7 (±2.1) | 4.8E+07 |
| 60 | UBN2                | 9.5E-04 | 1.9  | 23.7 (±0.6)  | 1.0E+08 | 7.7 (±3.2)  | 5.4E+07 |
| 61 | ZMYM2 <sup>c</sup>  | 2.1E-03 | 37.2 | 23.3 (±3.5)  | 1.0E+08 | 1.7 (±0.6)  | 2.7E+06 |
| 62 | UBTF                | 6.7E-03 | 6.2  | 17.3 (±0.6)  | 9.7E+07 | 3 (±1.7)    | 1.6E+07 |
| 63 | AHDC1               | 3.1E-05 | 7.9  | 29 (±2.6)    | 9.5E+07 | 4 (±0)      | 1.2E+07 |
| 64 | JMJD1C              | 2.7E-07 | 7.2  | 29.3 (±1.5)  | 9.2E+07 | 4 (±0)      | 1.3E+07 |
| 65 | PDCD11              | 9.3E-12 | 5.2  | 34.7 (±1.5)  | 8.6E+07 | 7 (±1.7)    | 1.6E+07 |
| 66 | SATB2               | 1.9E-02 | 7.8  | 20.7 (±5)    | 8.3E+07 | 1.7 (±2.1)  | 1.1E+07 |
| 67 | SMARCD2             | 9.1E-03 | 1.6  | 19.3 (±1.5)  | 8.1E+07 | 14.7 (±2.1) | 5.0E+07 |
| 68 | PRDM2               | 2.1E-13 | 42.2 | 24.7 (±0.6)  | 7.7E+07 | 0.7 (±0.6)  | 1.8E+06 |
| 69 | NOL10               | 4.9E-02 | 4.4  | 21 (±4)      | 7.6E+07 | 5 (±1)      | 1.7E+07 |
| 70 | EHMT1               | 8.2E-03 | 2.0  | 19.7 (±3.5)  | 7.4E+07 | 7.3 (±1.5)  | 3.8E+07 |
| 71 | TCF20               | 6.2E-09 | 11.7 | 28 (±1.7)    | 7.3E+07 | 3 (±2)      | 6.2E+06 |
| 72 | KNOP1               | 6.3E-04 | 2.9  | 19.3 (±2.3)  | 7.1E+07 | 7 (±2.6)    | 2.5E+07 |
| 73 | FADS1               | 6.3E-03 | 1.7  | 11.3 (±1.5)  | 7.1E+07 | 10 (±1)     | 4.3E+07 |

|     |           |         |      |             |         |            |         |
|-----|-----------|---------|------|-------------|---------|------------|---------|
| 74  | ARID3B    | 2.2E-08 | 8.0  | 16 (±1)     | 7.0E+07 | 3 (±1.7)   | 8.8E+06 |
| 75  | MSH6      | 4.8E-02 | 1.5  | 24 (±3)     | 7.0E+07 | 9.3 (±1.2) | 4.6E+07 |
| 76  | BMS1      | 6.0E-05 | 3.3  | 32.7 (±3.1) | 6.8E+07 | 5.7 (±1.2) | 2.1E+07 |
| 77  | AATF      | 1.6E-02 | 2.1  | 19.7 (±2.9) | 6.5E+07 | 7.7 (±1.5) | 3.1E+07 |
| 78  | RSL1D1    | 4.0E-02 | 1.4  | 17 (±1)     | 6.5E+07 | 8.3 (±2.5) | 4.5E+07 |
| 79  | ATAD2     | 1.5E-02 | 2.1  | 21.3 (±1.2) | 6.3E+07 | 8 (±3.6)   | 3.0E+07 |
| 80  | HNRNPH3   | 2.5E-02 | 2.1  | 5.3 (±0.6)  | 6.3E+07 | 5 (±1)     | 3.0E+07 |
| 81  | SCD       | 1.2E-03 | 1.7  | 8.3 (±1.5)  | 6.3E+07 | 5.3 (±2.3) | 3.7E+07 |
| 82  | EHMT2     | 1.8E-06 | 3.5  | 18 (±1)     | 5.9E+07 | 4 (±1)     | 1.7E+07 |
| 83  | SDHA      | 8.4E-03 | 2.0  | 11.3 (±0.6) | 5.3E+07 | 5.3 (±1.5) | 2.6E+07 |
| 84  | DDB1      | 1.1E-03 | 2.7  | 15.3 (±2.1) | 5.0E+07 | 5.3 (±2.1) | 1.9E+07 |
| 85  | ELMSAN1   | 8.0E-05 | 7.8  | 22.3 (±3.2) | 4.7E+07 | 3.3 (±1.5) | 6.0E+06 |
| 86  | PHIP      | 1.0E-03 | 5.4  | 16 (±1)     | 4.6E+07 | 2.7 (±0.6) | 8.4E+06 |
| 87  | MAGEC1    | 3.1E-04 | 3.0  | 6.3 (±0.6)  | 4.5E+07 | 1.7 (±0.6) | 1.5E+07 |
| 88  | CBFA2T3   | 1.5E-04 | 3.6  | 9.7 (±2.1)  | 4.5E+07 | 3 (±1.7)   | 1.2E+07 |
| 89  | LIN54     | 3.2E-03 | 2.3  | 17.3 (±2.5) | 4.5E+07 | 5.7 (±1.2) | 1.9E+07 |
| 90  | FBRS      | 9.9E-03 | 2.3  | 8 (±0)      | 4.3E+07 | 3 (±1)     | 1.9E+07 |
| 91  | ZNF518B   | 2.3E-05 | 4.6  | 15 (±0)     | 4.2E+07 | 2.3 (±0.6) | 9.2E+06 |
| 92  | CLPX      | 1.7E-06 | 4.1  | 11 (±1)     | 4.1E+07 | 3 (±1)     | 1.0E+07 |
| 93  | NCLN      | 7.1E-08 | 5.3  | 8.3 (±0.6)  | 4.1E+07 | 3.3 (±2.9) | 7.7E+06 |
| 94  | DDX24     | 4.6E-02 | 1.2  | 21 (±3)     | 4.1E+07 | 6.7 (±2.3) | 3.5E+07 |
| 95  | IARS2     | 2.4E-03 | 2.7  | 9.7 (±2.1)  | 4.1E+07 | 3.7 (±0.6) | 1.5E+07 |
| 96  | ABCB10    | 4.1E-03 | 8.5  | 11.7 (±2.1) | 3.9E+07 | 2.3 (±1.2) | 4.5E+06 |
| 97  | FANCI     | 4.0E-04 | 2.1  | 12.3 (±2.5) | 3.8E+07 | 7.7 (±1.5) | 1.8E+07 |
| 98  | ZNF384    | 7.4E-03 | 8.2  | 11 (±0)     | 3.7E+07 | 1 (±0)     | 4.5E+06 |
| 99  | ZNF644    | 6.9E-10 | 6.9  | 17 (±2)     | 3.7E+07 | 2.3 (±1.2) | 5.3E+06 |
| 100 | MPHOSPH10 | 2.2E-08 | 3.7  | 18 (±3)     | 3.6E+07 | 6 (±2)     | 9.6E+06 |
| 101 | MTF2      | 4.7E-14 | 47.3 | 2.7 (±0.6)  | 3.5E+07 | 0.3 (±0.6) | 7.3E+05 |
| 102 | EIF4A3    | 1.5E-02 | 1.5  | 7.7 (±0.6)  | 3.3E+07 | 6.7 (±2.3) | 2.3E+07 |
| 103 | RCOR2     | ‡       | ‡    | 10 (±2.6)   | 3.3E+07 | 0          | 0       |
| 104 | NOL11     | 3.2E-11 | 20.6 | 7.7 (±1.2)  | 3.2E+07 | 0.7 (±0.6) | 1.6E+06 |
| 105 | CHD1      | 1.3E-04 | 10.4 | 17 (±2)     | 3.2E+07 | 2 (±2)     | 3.1E+06 |
| 106 | ZEB2      | 1.7E-02 | 2.3  | 10 (±1)     | 3.2E+07 | 3.7 (±0.6) | 1.4E+07 |
| 107 | DDX27     | 1.5E-06 | 5.8  | 11.3 (±2.1) | 3.0E+07 | 2 (±0)     | 5.2E+06 |
| 108 | RBM15     | 3.2E-03 | 2.9  | 15.3 (±1.5) | 3.0E+07 | 5 (±2)     | 1.0E+07 |
| 109 | TRIM41    | 2.8E-11 | 7.0  | 9.3 (±1.5)  | 2.8E+07 | 1.7 (±0.6) | 4.0E+06 |
| 110 | L3MBTL3   | 4.0E-12 | 15.2 | 11 (±1.7)   | 2.6E+07 | 0.7 (±0.6) | 1.7E+06 |
| 111 | UTP3      | 6.0E-05 | 7.5  | 13.7 (±2.3) | 2.6E+07 | 1.3 (±1.2) | 3.5E+06 |

|     |                    |         |      |             |         |            |         |
|-----|--------------------|---------|------|-------------|---------|------------|---------|
| 112 | PIAS2              | 1.8E-11 | 7.8  | 8 (±0)      | 2.5E+07 | 1 (±0)     | 3.3E+06 |
| 113 | SSBP2              | 5.2E-05 | 3.7  | 1.7 (±0.6)  | 2.5E+07 | 1.3 (±1.2) | 6.9E+06 |
| 114 | NCOA1              | 2.9E-05 | 10.0 | 5 (±1)      | 2.1E+07 | 0.7 (±0.6) | 2.1E+06 |
| 115 | ESF1               | 6.0E-04 | 4.3  | 10 (±3.6)   | 2.0E+07 | 1.7 (±2.1) | 4.6E+06 |
| 116 | CUL4B              | 9.3E-06 | 23.3 | 1.3 (±0.6)  | 1.9E+07 | 0.3 (±0.6) | 8.3E+05 |
| 117 | ORC2               | 1.3E-10 | 5.9  | 6 (±1.7)    | 1.9E+07 | 1.7 (±0.6) | 3.3E+06 |
| 118 | ZFPM1              | ‡       | ‡    | 6 (±1)      | 1.9E+07 | 0          | 0       |
| 119 | DIDO1              | 2.6E-02 | 1.0  | 10 (±2)     | 1.9E+07 | 4.3 (±1.5) | 1.9E+07 |
| 120 | MCM5               | 4.0E-03 | 1.4  | 8 (±1)      | 1.9E+07 | 4 (±1.7)   | 1.3E+07 |
| 121 | IQSEC1             | 4.9E-13 | 13.1 | 7 (±1.7)    | 1.8E+07 | 0.3 (±0.6) | 1.4E+06 |
| 122 | LDB2               | ‡       | ‡    | 2 (±0)      | 1.8E+07 | 0          | 0       |
| 123 | USP36              | 6.8E-16 | 11.9 | 8 (±1)      | 1.7E+07 | 0.7 (±0.6) | 1.4E+06 |
| 124 | PIAS1              | ‡       | ‡    | 6.7 (±1.2)  | 1.7E+07 | 0          | 0       |
| 125 | FOXP4              | 4.4E-11 | 13.5 | 7.7 (±0.6)  | 1.7E+07 | 0.7 (±1.2) | 1.2E+06 |
| 126 | SUPT16H            | 1.9E-04 | 3.3  | 7.7 (±1.2)  | 1.7E+07 | 2 (±0)     | 5.0E+06 |
| 127 | BCORL1             | ‡       | ‡    | 19.3 (±4.6) | 1.7E+07 | 0          | 0       |
| 128 | PHF14              | 9.5E-04 | 2.4  | 8.3 (±0.6)  | 1.6E+07 | 2 (±0)     | 6.7E+06 |
| 129 | UTP18              | 5.7E-03 | 7.7  | 8.7 (±1.5)  | 1.6E+07 | 1 (±0)     | 2.1E+06 |
| 130 | TMEM209            | 1.9E-02 | 2.1  | 6 (±1)      | 1.6E+07 | 3.7 (±1.2) | 7.9E+06 |
| 131 | NR2C2              | ‡       | ‡    | 9 (±1)      | 1.6E+07 | 0          | 0       |
| 132 | PCGF1              | 1.2E-03 | 6.6  | 5 (±0)      | 1.6E+07 | 0.7 (±1.2) | 2.4E+06 |
| 133 | ZMYM3 <sup>c</sup> | 1.7E-02 | 2.2  | 6.7 (±1.2)  | 1.6E+07 | 1.7 (±2.1) | 7.2E+06 |
| 134 | EPC2               | 2.1E-02 | 1.6  | 8.3 (±1.5)  | 1.6E+07 | 3.7 (±2.9) | 9.9E+06 |
| 135 | EED                | 3.1E-03 | 3.2  | 7 (±2)      | 1.5E+07 | 3 (±1.7)   | 4.8E+06 |
| 136 | ZNF512B            | 1.9E-06 | 32.1 | 8 (±1)      | 1.5E+07 | 0.3 (±0.6) | 4.7E+05 |
| 137 | RRP1B              | 1.7E-03 | 5.8  | 8 (±2)      | 1.5E+07 | 0.7 (±0.6) | 2.6E+06 |
| 138 | CPS1               | 4.6E-02 | 3.2  | 1.7 (±0.6)  | 1.5E+07 | 0.3 (±0.6) | 4.7E+06 |
| 139 | LONP1              | 6.0E-05 | 2.5  | 10 (±1)     | 1.4E+07 | 2.3 (±2.1) | 5.7E+06 |
| 140 | PRDM10             | ‡       | ‡    | 2 (±1)      | 1.4E+07 | 0          | 0       |
| 141 | NSD3               | 5.3E-12 | 14.7 | 7.3 (±2.3)  | 1.4E+07 | 0.7 (±0.6) | 9.3E+05 |
| 142 | RCL1               | 3.5E-02 | 1.4  | 5 (±1)      | 1.4E+07 | 3.3 (±1.2) | 9.8E+06 |
| 143 | UTP6               | 1.7E-03 | 5.2  | 5.7 (±1.2)  | 1.3E+07 | 1 (±1)     | 2.5E+06 |
| 144 | ORC3               | 2.6E-02 | 5.5  | 6 (±3)      | 1.3E+07 | 0.7 (±0.6) | 2.3E+06 |
| 145 | PPOX               | 9.0E-07 | 8.4  | 4.7 (±0.6)  | 1.3E+07 | 0.7 (±0.6) | 1.5E+06 |
| 146 | NOL4               | ‡       | ‡    | 3.3 (±0.6)  | 1.3E+07 | 0          | 0       |
| 147 | KDM5B              | 2.0E-05 | 17.9 | 10.3 (±2.5) | 1.3E+07 | 0.7 (±1.2) | 7.0E+05 |
| 148 | TAL1               | 3.6E-05 | 12.0 | 4.3 (±2.3)  | 1.2E+07 | 0.7 (±0.6) | 1.0E+06 |
| 149 | NEPRO              | 5.3E-03 | 4.2  | 4.7 (±1.2)  | 1.2E+07 | 1 (±0)     | 2.9E+06 |

|     |                     |         |      |            |         |            |         |
|-----|---------------------|---------|------|------------|---------|------------|---------|
| 150 | FOXL2               | 2.1E-03 | 9.6  | 2 (±1)     | 1.2E+07 | 0.7 (±0.6) | 1.2E+06 |
| 151 | ZNF217 <sup>c</sup> | ‡       | ‡    | 5.3 (±0.6) | 1.2E+07 | 0          | 0       |
| 152 | CHD9                | ‡       | ‡    | 8 (±1)     | 1.1E+07 | 0          | 0       |
| 153 | NKTR                | ‡       | ‡    | 5.3 (±2.3) | 1.1E+07 | 0          | 0       |
| 154 | PPA2                | 3.4E-02 | 3.6  | 1.3 (±1.2) | 1.1E+07 | 1 (±1)     | 3.0E+06 |
| 155 | IK                  | 4.6E-02 | 1.3  | 6.7 (±1.5) | 1.1E+07 | 3.7 (±2.1) | 8.2E+06 |
| 156 | ARVCF               | ‡       | ‡    | 8.3 (±1.2) | 1.1E+07 | 0          | 0       |
| 157 | CSNK2A1             | ‡       | ‡    | 5.3 (±2.1) | 1.1E+07 | 0          | 0       |
| 158 | TET2                | ‡       | ‡    | 3.7 (±1.5) | 1.0E+07 | 0          | 0       |
| 159 | PLOD1               | ‡       | ‡    | 5.7 (±2.1) | 1.0E+07 | 0          | 0       |
| 160 | PIGT                | 3.1E-06 | 18.1 | 3 (±3)     | 1.0E+07 | 0.3 (±0.6) | 5.7E+05 |
| 161 | MDN1                | 6.7E-03 | 2.8  | 8.3 (±3.5) | 1.0E+07 | 2 (±1)     | 3.7E+06 |
| 162 | FUBP3               | 4.4E-02 | 4.4  | 3.7 (±0.6) | 1.0E+07 | 0.3 (±0.6) | 2.3E+06 |
| 163 | PWP2                | ‡       | ‡    | 6 (±1)     | 9.9E+06 | 0          | 0       |
| 164 | ADSL                | 2.6E-02 | 3.2  | 5.3 (±3.2) | 9.7E+06 | 3.3 (±1.2) | 3.0E+06 |
| 165 | HMX3                | ‡       | ‡    | 1 (±0)     | 9.6E+06 | 0          | 0       |
| 166 | PINX1               | 1.1E-02 | 2.3  | 4.3 (±1.2) | 9.6E+06 | 2 (±0)     | 4.2E+06 |
| 167 | RAI1                | 2.0E-02 | 20.3 | 7 (±3.5)   | 9.5E+06 | 0.3 (±0.6) | 4.7E+05 |
| 168 | SLTM                | ‡       | ‡    | 4 (±1)     | 9.3E+06 | 0          | 0       |
| 169 | FBRSL1              | 2.5E-02 | 7.7  | 6.7 (±1.5) | 9.2E+06 | 0.7 (±1.2) | 1.2E+06 |
| 170 | INCENP              | 4.1E-04 | 4.5  | 4 (±0)     | 9.1E+06 | 0.7 (±0.6) | 2.0E+06 |
| 171 | PITX1               | 1.2E-02 | 12.8 | 2 (±1)     | 8.9E+06 | 0.3 (±0.6) | 7.0E+05 |
| 172 | SRRT                | 1.3E-02 | 1.8  | 6 (±1)     | 8.8E+06 | 3 (±2.6)   | 4.9E+06 |
| 173 | WDR43               | 1.6E-02 | 8.5  | 6 (±0)     | 8.7E+06 | 1 (±0)     | 1.0E+06 |
| 174 | FAM83A              | 9.3E-04 | 7.6  | 5 (±1)     | 8.6E+06 | 1.3 (±1.2) | 1.1E+06 |
| 175 | RAVER1              | 9.7E-04 | 3.4  | 6.7 (±2.9) | 8.5E+06 | 2 (±0)     | 2.5E+06 |
| 176 | WT1                 | 5.6E-03 | 2.2  | 2.3 (±0.6) | 8.5E+06 | 1.3 (±0.6) | 3.9E+06 |
| 177 | RPF2                | 4.2E-02 | 2.0  | 4 (±0)     | 8.4E+06 | 3 (±1.7)   | 4.2E+06 |
| 178 | STRBP               | ‡       | ‡    | 3.7 (±3.1) | 8.3E+06 | 0          | 0       |
| 179 | UBE3C               | 5.9E-03 | 20.6 | 6.7 (±1.5) | 8.2E+06 | 0.3 (±0.6) | 4.0E+05 |
| 180 | SENP6               | 6.8E-03 | 20.3 | 7.3 (±2.3) | 8.1E+06 | 0.3 (±0.6) | 4.0E+05 |
| 181 | NOM1                | 3.8E-02 | 2.8  | 5 (±1)     | 8.0E+06 | 1.3 (±0.6) | 2.9E+06 |
| 182 | PRKD2               | 2.5E-02 | 1.9  | 4.7 (±1.2) | 7.9E+06 | 1.3 (±0.6) | 4.1E+06 |
| 183 | FASTKD1             | 1.4E-02 | 2.0  | 4 (±1)     | 7.8E+06 | 1.7 (±1.2) | 4.0E+06 |
| 184 | VPS72               | 5.1E-03 | 2.0  | 4 (±1)     | 7.8E+06 | 1 (±0)     | 3.8E+06 |
| 185 | OPA1                | 4.0E-02 | 3.4  | 6 (±2.6)   | 7.8E+06 | 0.7 (±1.2) | 2.3E+06 |
| 186 | POM121              | 4.2E-02 | 1.5  | 4 (±1)     | 7.6E+06 | 1.7 (±1.2) | 4.9E+06 |
| 187 | KIF22               | ‡       | ‡    | 4.3 (±2.1) | 7.6E+06 | 0          | 0       |

|     |          |         |      |            |         |            |         |
|-----|----------|---------|------|------------|---------|------------|---------|
| 188 | TTLL12   | 8.4E-03 | 1.8  | 6.7 (±2.1) | 7.5E+06 | 1.7 (±1.5) | 4.1E+06 |
| 189 | MORC2    | ‡       | ‡    | 4.7 (±1.5) | 7.3E+06 | 0          | 0       |
| 190 | BAZ1A    | ‡       | ‡    | 5 (±2.6)   | 7.3E+06 | 0          | 0       |
| 191 | BRD3     | ‡       | ‡    | 1 (±0)     | 7.3E+06 | 0          | 0       |
| 192 | CLSPN    | 2.5E-02 | 6.5  | 4.7 (±1.5) | 7.2E+06 | 0.7 (±1.2) | 1.1E+06 |
| 193 | PRKCI    | 5.7E-06 | 8.9  | 2.3 (±1.5) | 7.1E+06 | 0.3 (±0.6) | 8.0E+05 |
| 194 | SSBP3    | 9.7E-05 | 5.2  | 2 (±1)     | 6.9E+06 | 0.7 (±0.6) | 1.3E+06 |
| 195 | YTHDC1   | 4.3E-02 | 16.7 | 3 (±1)     | 6.7E+06 | 0.3 (±0.6) | 4.0E+05 |
| 196 | POLRMT   | 2.2E-02 | 1.7  | 4.7 (±2.1) | 6.6E+06 | 1.7 (±1.2) | 3.8E+06 |
| 197 | PRKCA    | 3.1E-02 | 11.0 | 6 (±2)     | 6.6E+06 | 0.7 (±0.6) | 6.0E+05 |
| 198 | TMED9    | 4.2E-02 | 3.1  | 1.3 (±0.6) | 6.3E+06 | 0.7 (±0.6) | 2.0E+06 |
| 199 | TCF3     | ‡       | ‡    | 5 (±1)     | 6.3E+06 | 0          | 0       |
| 200 | PGM2     | 3.3E-04 | 36.9 | 3 (±1.7)   | 6.0E+06 | 0.7 (±1.2) | 1.6E+05 |
| 201 | ZBTB33   | ‡       | ‡    | 3.7 (±1.2) | 6.0E+06 | 0          | 0       |
| 202 | DDX54    | ‡       | ‡    | 4.7 (±1.2) | 6.0E+06 | 0          | 0       |
| 203 | TLE1     | ‡       | ‡    | 1 (±0)     | 5.8E+06 | 0          | 0       |
| 204 | RAD54L2  | ‡       | ‡    | 3.3 (±1.5) | 5.6E+06 | 0          | 0       |
| 205 | KDM2A    | ‡       | ‡    | 2.7 (±1.2) | 5.5E+06 | 0          | 0       |
| 206 | ZBTB9    | ‡       | ‡    | 2.7 (±1.2) | 5.5E+06 | 0          | 0       |
| 207 | TARS2    | 4.6E-02 | 5.0  | 1 (±1)     | 5.5E+06 | 0.7 (±1.2) | 1.1E+06 |
| 208 | WDR46    | ‡       | ‡    | 3.3 (±1.2) | 5.4E+06 | 0          | 0       |
| 209 | DDX56    | 7.5E-11 | 20.0 | 1.3 (±0.6) | 5.3E+06 | 0.3 (±0.6) | 2.7E+05 |
| 210 | KMT2C    | 3.2E-03 | 33.5 | 5.3 (±1.2) | 5.1E+06 | 0.3 (±0.6) | 1.5E+05 |
| 211 | TUBGCP4  | 5.0E-03 | 2.6  | 4.7 (±2.1) | 5.0E+06 | 0.7 (±0.6) | 2.0E+06 |
| 212 | INTS6    | ‡       | ‡    | 3.7 (±1.2) | 4.8E+06 | 0          | 0       |
| 213 | XPC      | 2.2E-04 | 10.9 | 2.3 (±1.5) | 4.7E+06 | 0.3 (±0.6) | 4.3E+05 |
| 214 | CWC27    | ‡       | ‡    | 3.7 (±1.2) | 4.7E+06 | 0          | 0       |
| 215 | EPC1     | 4.0E-02 | 2.6  | 3.7 (±1.2) | 4.6E+06 | 0.7 (±0.6) | 1.8E+06 |
| 216 | CDK5RAP1 | ‡       | ‡    | 3.3 (±2.1) | 4.5E+06 | 0          | 0       |
| 217 | HMGB1P1  | 3.4E-04 | 2.7  | 1 (±1)     | 4.3E+06 | 0.3 (±0.6) | 1.6E+06 |
| 218 | LIN9     | 2.2E-09 | 11.5 | 5.7 (±0.6) | 4.2E+06 | 0.7 (±1.2) | 3.7E+05 |
| 219 | EWSR1    | 1.3E-04 | 4.6  | 2 (±0)     | 4.1E+06 | 0.3 (±0.6) | 9.0E+05 |
| 220 | FAM83H   | 1.7E-03 | 12.8 | 3.3 (±1.5) | 4.0E+06 | 0.3 (±0.6) | 3.1E+05 |
| 221 | MTO1     | 1.3E-03 | 3.0  | 3 (±0)     | 3.9E+06 | 0.3 (±0.6) | 1.3E+06 |
| 222 | RRP1     | 6.3E-05 | 7.3  | 1.7 (±0.6) | 3.9E+06 | 0.3 (±0.6) | 5.3E+05 |
| 223 | SLU7     | 8.7E-03 | 11.5 | 3.7 (±1.5) | 3.8E+06 | 0.3 (±0.6) | 3.3E+05 |
| 224 | CHTF18   | 9.1E-10 | 6.1  | 4.7 (±0.6) | 3.7E+06 | 0.3 (±0.6) | 6.0E+05 |
| 225 | ERCC4    | 5.7E-07 | 7.1  | 4.7 (±1.2) | 3.5E+06 | 0.3 (±0.6) | 5.0E+05 |

|     |          |         |      |                   |         |                   |         |
|-----|----------|---------|------|-------------------|---------|-------------------|---------|
| 226 | ORC1     | 5.0E-04 | 5.3  | 2.3 ( $\pm 1.2$ ) | 3.5E+06 | 0.3 ( $\pm 0.6$ ) | 6.7E+05 |
| 227 | RBFOX1   | 2.8E-03 | 3.7  | 1 ( $\pm 0$ )     | 3.2E+06 | 0.7 ( $\pm 0.6$ ) | 8.7E+05 |
| 228 | RAD18    | 3.1E-03 | 6.0  | 1.7 ( $\pm 2.1$ ) | 3.2E+06 | 0.7 ( $\pm 0.6$ ) | 5.4E+05 |
| 229 | SLC25A37 | 3.4E-09 | 14.1 | 2.7 ( $\pm 0.6$ ) | 3.1E+06 | 0.3 ( $\pm 0.6$ ) | 2.2E+05 |
| 230 | STIL     | 1.6E-02 | 3.8  | 1.7 ( $\pm 0.6$ ) | 2.9E+06 | 0.3 ( $\pm 0.6$ ) | 7.7E+05 |
| 231 | KMT2B    | 1.7E-02 | 3.8  | 2.7 ( $\pm 1.5$ ) | 2.9E+06 | 0.7 ( $\pm 0.6$ ) | 7.7E+05 |
| 232 | MAP1S    | 4.2E-02 | 18.6 | 3.3 ( $\pm 1.2$ ) | 2.8E+06 | 0.3 ( $\pm 0.6$ ) | 1.5E+05 |
| 233 | RBM6     | 3.0E-02 | 4.2  | 3 ( $\pm 1$ )     | 2.8E+06 | 0.3 ( $\pm 0.6$ ) | 6.7E+05 |
| 234 | CLK3     | 1.4E-03 | 4.2  | 2.7 ( $\pm 0.6$ ) | 2.6E+06 | 0.7 ( $\pm 1.2$ ) | 6.3E+05 |
| 235 | HMGB3    | 3.9E-02 | 3.4  | 1 ( $\pm 0$ )     | 2.6E+06 | 0.3 ( $\pm 0.6$ ) | 7.7E+05 |
| 236 | CSNK2B   | 6.4E-03 | 3.7  | 1 ( $\pm 1.7$ )   | 2.4E+06 | 0.3 ( $\pm 0.6$ ) | 6.3E+05 |
| 237 | CPT1A    | 5.1E-03 | 2.0  | 2 ( $\pm 1$ )     | 2.3E+06 | 0.3 ( $\pm 0.6$ ) | 1.2E+06 |
| 238 | AGPAT5   | 2.3E-12 | 7.3  | 1 ( $\pm 1$ )     | 2.1E+06 | 1 ( $\pm 0$ )     | 2.9E+05 |
| 239 | KIAA0391 | 4.0E-02 | 3.2  | 2.7 ( $\pm 0.6$ ) | 2.1E+06 | 1.3 ( $\pm 0.6$ ) | 6.6E+05 |
| 240 | FPGS     | 2.7E-19 | 17.7 | 1.7 ( $\pm 0.6$ ) | 1.2E+06 | 0.3 ( $\pm 0.6$ ) | 7.0E+04 |
| 241 | SNAP47   | 2.4E-02 | 1.4  | 1 ( $\pm 1$ )     | 1.5E+05 | 0.7 ( $\pm 0.6$ ) | 1.1E+05 |

<sup>a</sup> Determined by 2 tailed t-distribution of ranked BirA\* intensities comparing the closest 20 points by nonparametric regression and spline smoothing

<sup>b</sup> Determined by GF11B-BirA\* and BirA\* intensities

<sup>c</sup> Known LSD1-BHC complex members

<sup>#</sup> Unable to calculate due to BirA\* zero intensity
