# Supplementary material
Source: PubMed Central journal article supplement (PMC6580704)
Supplement: MCB.00020-19-s0002.pdf [file MCB.00020-19-s0002.pdf]

**Table S2.** Comparison of the top 100 LSD1-dependent protein candidates associated with GF11B

| Rank | GF11B-WT vs. GF11B-ΔSNAG |                             | GF11B-WT vs. GF11B-P2A |                             | SNAG vs. BirA* Only |                             |
|------|--------------------------|-----------------------------|------------------------|-----------------------------|---------------------|-----------------------------|
|      | Gene name                | <i>P</i> value <sup>a</sup> | Gene name              | <i>P</i> value <sup>a</sup> | Gene name           | <i>P</i> value <sup>a</sup> |
| 1    | FERMT3                   | 6.13E-22                    | ZNF451                 | 3.22E-17                    | LSG1                | 9.06E-30                    |
| 2    | PRDM10                   | 2.22E-15                    | RCOR3                  | 4.40E-16                    | FAM83H              | 1.89E-26                    |
| 3    | ZNF451                   | 1.34E-13                    | <b>GSE1</b>            | 5.28E-14                    | MARCKSL1            | 5.14E-13                    |
| 4    | RCOR3                    | 2.28E-12                    | L3MBTL3                | 1.62E-13                    | <b>PHF21A</b>       | 6.01E-21                    |
| 5    | <b>RCOR1</b>             | 4.44E-12                    | <b>RREB1</b>           | 1.00E-12                    | RCOR3               | 7.48E-20                    |
| 6    | <b>KDM1A (LSD1)</b>      | 1.60E-11                    | ZNF622                 | 1.98E-12                    | <b>RREB1</b>        | 2.20E-17                    |
| 7    | <b>GSE1</b>              | 6.06E-11                    | CUL4B                  | 2.51E-12                    | <b>KDM1A (LSD1)</b> | 3.68E-16                    |
| 8    | <b>HMG20B</b>            | 1.42E-10                    | PRDM2                  | 2.84E-12                    | PRKCA               | 8.17E-16                    |
| 9    | <b>RREB1</b>             | 1.84E-10                    | CBX4                   | 1.35E-11                    | AFTPH               | 1.70E-14                    |
| 10   | CBX4                     | 2.37E-10                    | <b>KDM1A (LSD1)</b>    | 6.68E-11                    | <b>RCOR1</b>        | 1.12E-13                    |
| 11   | RAD54L2                  | 3.46E-10                    | LARP1                  | 7.48E-11                    | FASTKD1             | 5.37E-13                    |
| 12   | L3MBTL3                  | 3.51E-10                    | GFM1                   | 1.53E-10                    | AP3B1               | 7.61E-13                    |
| 13   | PTK2B                    | 5.27E-10                    | SLX4                   | 3.00E-10                    | NAP1L4              | 9.14E-13                    |
| 14   | P4HB                     | 1.44E-09                    | SEPT7                  | 3.73E-10                    | NAP1L1              | 2.89E-12                    |
| 15   | NUP188                   | 1.11E-08                    | <b>ZMYM2</b>           | 6.66E-10                    | DNAJB12             | 4.40E-12                    |
| 16   | EIF2B5                   | 1.73E-08                    | GIGYF2                 | 1.13E-09                    | TSR1                | 7.75E-12                    |
| 17   | HIST1H1A                 | 2.22E-08                    | SEC23B                 | 3.10E-09                    | TMED9               | 2.09E-11                    |
| 18   | FAM83H                   | 2.99E-08                    | ARVCF                  | 3.85E-09                    | ROR2                | 2.61E-11                    |
| 19   | ZNF629                   | 6.54E-08                    | <b>RCOR1</b>           | 4.77E-09                    | MAP2K7              | 1.12E-10                    |
| 20   | OSBPL3                   | 9.68E-08                    | PRDM10                 | 5.43E-09                    | IPO9                | 1.33E-09                    |
| 21   | ARVCF                    | 1.45E-07                    | <b>HMG20B</b>          | 6.28E-09                    | NOL11               | 1.08E-08                    |
| 22   | <b>HDAC2</b>             | 1.58E-07                    | YARS                   | 1.03E-08                    | <b>HMG20B</b>       | 1.51E-08                    |
| 23   | PRDM2                    | 1.77E-07                    | <b>PHF21A</b>          | 1.13E-08                    | WDR43               | 2.01E-08                    |
| 24   | <b>ZMYM2</b>             | 2.97E-07                    | FAM208B                | 1.20E-08                    | PPP4R3A             | 4.59E-08                    |
| 25   | BUB1B                    | 5.45E-07                    | ZNF609                 | 1.78E-08                    | UBE2O               | 8.66E-08                    |
| 26   | <b>HDAC1</b>             | 5.53E-07                    | cDNA FLJ51764          | 4.26E-08                    | RRP7BP              | 1.12E-07                    |
| 27   | NCKAP1                   | 6.44E-07                    | MED14                  | 6.05E-08                    | CHTF18              | 1.30E-07                    |
| 28   | TARS2                    | 6.78E-07                    | MAGEC1                 | 7.59E-08                    | L3MBTL3             | 1.45E-07                    |
| 29   | <b>HMG20A</b>            | 1.28E-06                    | RAB3GAP1               | 1.39E-07                    | MTCH2               | 2.66E-07                    |
| 30   | EDC4                     | 1.80E-06                    | NASP                   | 3.22E-07                    | IPO7                | 4.73E-07                    |
| 31   | CBSL                     | 1.88E-06                    | BRD8                   | 9.26E-07                    | TNRC18              | 4.94E-07                    |
| 32   | NCOA1                    | 2.34E-06                    | RAI1                   | 9.74E-07                    | DDX27               | 8.64E-07                    |
| 33   | KDM5B                    | 6.37E-06                    | PIAS2                  | 1.60E-06                    | NOP14               | 1.01E-06                    |
| 34   | EHD4                     | 6.58E-06                    | RSF1                   | 2.66E-06                    | NOB1                | 1.61E-06                    |
| 35   | ZFPM1                    | 8.87E-06                    | GPATCH1                | 7.60E-06                    | BYSL                | 1.62E-06                    |

|    |               |          |               |          |               |          |
|----|---------------|----------|---------------|----------|---------------|----------|
| 36 | SMARCAL1      | 1.26E-05 | NUP58         | 8.82E-06 | UBE3C         | 1.83E-06 |
| 37 | <b>PHF21A</b> | 1.53E-05 | KIF22         | 1.06E-05 | <b>GSE1</b>   | 3.06E-06 |
| 38 | SEC23B        | 1.75E-05 | RUNX1         | 1.13E-05 | PDAP1         | 4.41E-06 |
| 39 | ATRX          | 3.32E-05 | <b>HMG20A</b> | 1.31E-05 | RRP1B         | 4.42E-06 |
| 40 | PEX1          | 4.92E-05 | IQSEC1        | 1.64E-05 | RPL15         | 5.68E-06 |
| 41 | GRAP2         | 5.12E-05 | MTF2          | 1.65E-05 | PDCD11        | 1.09E-05 |
| 42 | ABCB10        | 6.04E-05 | HDAC3         | 2.74E-05 | BUD13         | 1.40E-05 |
| 43 | HBZ           | 6.73E-05 | <b>HDAC1</b>  | 3.06E-05 | MRPS27        | 1.59E-05 |
| 44 | AMBRA1        | 6.91E-05 | TRIM41        | 3.10E-05 | RRBP1         | 1.62E-05 |
| 45 | ANKHD1        | 9.12E-05 | SETD2         | 3.70E-05 | MARS          | 1.87E-05 |
| 46 | STAT5B        | 1.03E-04 | TUBB1         | 4.52E-05 | PRDM2         | 1.92E-05 |
| 47 | JMJD1C        | 1.18E-04 | PTK2B         | 4.54E-05 | IGF2BP2       | 3.99E-05 |
| 48 | CHD9          | 1.57E-04 | WRN           | 6.36E-05 | PGM2          | 5.05E-05 |
| 49 | SLX4          | 2.72E-04 | ATRX          | 8.12E-05 | FDPS          | 6.59E-05 |
| 50 | MAP1B         | 2.73E-04 | PIAS1         | 1.17E-04 | OPA1          | 7.06E-05 |
| 51 | PRR12         | 3.06E-04 | KPNA5         | 1.33E-04 | MYBBP1A       | 7.87E-05 |
| 52 | NCOR2         | 3.12E-04 | ABCB10        | 1.69E-04 | GF11B         | 8.21E-05 |
| 53 | BCOR          | 3.84E-04 | NCOR2         | 1.80E-04 | FBRSL1        | 9.39E-05 |
| 54 | SLC25A12      | 4.31E-04 | RAD18         | 1.91E-04 | CARM1         | 1.65E-04 |
| 55 | ISYNA1        | 5.51E-04 | ZMYND8        | 1.96E-04 | <b>HMG20A</b> | 1.70E-04 |
| 56 | XRCC5         | 9.24E-04 | ZNF384        | 2.35E-04 | NEPRO         | 1.72E-04 |
| 57 | PYGB          | 1.14E-03 | PIGT          | 2.49E-04 | COQ5          | 1.97E-04 |
| 58 | FLII          | 1.29E-03 | BCOR          | 2.59E-04 | LENG8         | 2.05E-04 |
| 59 | TBL1X         | 1.41E-03 | ZFPM1         | 3.06E-04 | ATN1          | 2.65E-04 |
| 60 | OTUD4         | 1.46E-03 | TRNAU1AP      | 3.35E-04 | COMMD3        | 3.37E-04 |
| 61 | ABCD3         | 1.52E-03 | NR2C2         | 3.85E-04 | LTV1          | 3.46E-04 |
| 62 | VPS52         | 1.62E-03 | CKAP5         | 3.91E-04 | RRP12         | 4.01E-04 |
| 63 | PIAS1         | 1.71E-03 | SMARCAL1      | 3.95E-04 | ORC1          | 4.56E-04 |
| 64 | LARP4B        | 1.79E-03 | CTR9          | 4.23E-04 | FERMT3        | 4.92E-04 |
| 65 | GALK2         | 1.98E-03 | FUBP3         | 4.51E-04 | PINX1         | 5.42E-04 |
| 66 | RUNX1         | 2.08E-03 | cDNA FLJ51028 | 4.60E-04 | GTF2H2C       | 6.37E-04 |
| 67 | UBAP2         | 2.13E-03 | CNOT1         | 6.62E-04 | ZNF701        | 7.84E-04 |
| 68 | FECH          | 2.21E-03 | SENPA6        | 6.64E-04 | NUDT4         | 8.94E-04 |
| 69 | PRRC2C        | 2.35E-03 | TAF6L         | 7.46E-04 | KDM5B         | 9.43E-04 |
| 70 | EXOC3L2       | 2.86E-03 | ZNF592        | 7.49E-04 | RBFOX1        | 1.13E-03 |
| 71 | ASNS          | 2.88E-03 | VPS51         | 7.89E-04 | SLC3A2        | 1.25E-03 |
| 72 | AHDC1         | 2.92E-03 | HBZ           | 8.00E-04 | RPP40         | 1.28E-03 |
| 73 | CARD6         | 2.97E-03 | CBSL          | 8.05E-04 | LIG3          | 1.42E-03 |
| 74 | RICTOR        | 3.02E-03 | PLCD1         | 9.81E-04 | CCDC9         | 1.78E-03 |
| 75 | YARS          | 3.04E-03 | SDHA          | 1.19E-03 | SLC2A1        | 1.99E-03 |

|     |          |          |          |          |          |          |
|-----|----------|----------|----------|----------|----------|----------|
| 76  | FHOD1    | 3.36E-03 | KDM5B    | 1.21E-03 | NOL6     | 2.24E-03 |
| 77  | ZNF672   | 4.07E-03 | SBNO1    | 1.48E-03 | TBC1D14  | 2.27E-03 |
| 78  | C16orf58 | 4.26E-03 | TBL1X    | 1.56E-03 | HNRNPH3  | 2.59E-03 |
| 79  | HNRNPL   | 4.49E-03 | ATXN2    | 1.75E-03 | IMP4     | 2.71E-03 |
| 80  | ALDH18A1 | 6.11E-03 | TBL1XR1  | 1.79E-03 | HIST1H1C | 2.99E-03 |
| 81  | GOLGA2   | 6.18E-03 | RPA1     | 1.81E-03 | MMS19    | 3.08E-03 |
| 82  | PLCD1    | 6.31E-03 | KIF5A    | 1.87E-03 | NCOR2    | 3.19E-03 |
| 83  | TXNIP    | 7.04E-03 | DGCR14   | 2.10E-03 | RPL7L1   | 3.39E-03 |
| 84  | ALDH16A1 | 7.11E-03 | TRMT2A   | 2.13E-03 | BRMS1    | 3.41E-03 |
| 85  | ATXN2    | 7.45E-03 | ACACA    | 2.77E-03 | DDX56    | 3.77E-03 |
| 86  | PSMB5    | 7.79E-03 | EXOC2    | 2.96E-03 | KIF18A   | 3.79E-03 |
| 87  | GFM1     | 8.53E-03 | MSH3     | 3.04E-03 | BAZ1B    | 4.47E-03 |
| 88  | CNOT2    | 1.07E-02 | NKTR     | 3.20E-03 | CSPP1    | 4.54E-03 |
| 89  | QSER1    | 1.07E-02 | HAUS5    | 3.50E-03 | CBFB     | 4.57E-03 |
| 90  | DYRK1A   | 1.09E-02 | DDX51    | 3.79E-03 | SNAP23   | 4.96E-03 |
| 91  | RANBP9   | 1.14E-02 | CHD9     | 4.34E-03 | H2AFV    | 5.23E-03 |
| 92  | PPA2     | 1.18E-02 | RNPC3    | 4.60E-03 | BRAF     | 5.27E-03 |
| 93  | QARS     | 1.19E-02 | ZNF512B  | 5.33E-03 | IQSEC1   | 5.37E-03 |
| 94  | BIRC2    | 1.23E-02 | SMG7     | 5.40E-03 | ARAF     | 5.77E-03 |
| 95  | SMG7     | 1.25E-02 | BEND3    | 5.92E-03 | EBNA1BP2 | 5.85E-03 |
| 96  | CD3EAP   | 1.27E-02 | ZKSCAN4  | 6.08E-03 | USP36    | 6.04E-03 |
| 97  | MTFR1L   | 1.36E-02 | RCOR3    | 6.49E-03 | PRR5     | 6.15E-03 |
| 98  | UTP14C   | 1.41E-02 | HSD17B10 | 6.54E-03 | PHIP     | 6.71E-03 |
| 99  | KDM2B    | 1.43E-02 | HUWE1    | 6.59E-03 | GTPBP4   | 6.94E-03 |
| 100 | MAGEC1   | 1.50E-02 | ALDH18A1 | 6.65E-03 | MMTAG2   | 7.01E-03 |

<sup>a</sup>Determined by two tailed *t*-distribution of the z-score of the 20 neighboring ranked proteins.

Known BHC complex members in **RED**
