# Supplementary material
Source: PubMed Central journal article supplement (PMC6580704)
Supplement: MCB.00020-19-s0003.pdf [file MCB.00020-19-s0003.pdf]

**Table S3.** Oligonucleotides used in this study

| Oligo Name        | Sequence (5' to 3')                                              | Purpose                       |
|-------------------|------------------------------------------------------------------|-------------------------------|
| hHMG20A qPCR Fwd  | GATCTGGCTACCACTGGGTT                                             | RT-qPCR                       |
| hHMG20A qPCR Rev  | CCTCCTCGTTTACTTCGTTGC                                            | RT-qPCR                       |
| hHMG20B qPCR2 Fwd | CATGGGGGCTTCGTGGTGA                                              | RT-qPCR                       |
| hHMG20B qPCR2 Rev | CGCCAGCATCTTGGTGAT                                               | RT-qPCR                       |
| hGSE1 qPCR 1 Fwd  | GCCTGCAATGCACTGGCCTA                                             | RT-qPCR                       |
| hGSE1 qPCR 1 Rev  | GGAGCCTGGAATCCTTTGCTTC                                           | RT-qPCR                       |
| hPHF21A qPCR Fwd  | CTCCTGCTGCTCTGATCCC                                              | RT-qPCR                       |
| hPHF21A qPCR Rev  | GGCCTCTCGCACTTTTTAGA                                             | RT-qPCR                       |
| hHBA1/2 qPCR Fwd  | CCGGTCAACTTCAAGTCCTA                                             | RT-qPCR                       |
| hHBA1/2 qPCR Rev  | GGTATTTGGAGGTCAGCACGG                                            | RT-qPCR                       |
| hHBZ qPCR Fwd     | GAGCAGGCCCAACTCCAG                                               | RT-qPCR                       |
| hHBZ qPCR Rev     | TGTCGTCGATGCTCTTCACC                                             | RT-qPCR                       |
| hAHSP qPCR Fwd    | ATAAGGATCTCATTTCCGACGG                                           | RT-qPCR                       |
| hAHSP qPCR Rev    | CCTTGCTCGCTCTTGGGG                                               | RT-qPCR                       |
| hHBB qPCR Fwd     | GTGAACGTGGATGAAGTTGGTGGTGAG                                      | RT-qPCR                       |
| hHBB qPCR Rev     | TTGGACAGCAAGAAAGCGAGCTTAGTG                                      | RT-qPCR                       |
| hHBD qPCR Fwd     | GCACGTGGATCCTGAGAACT                                             | RT-qPCR                       |
| hHBD qPCR Rev     | ACCTTGAAGTAGGCATTGTGT                                            | RT-qPCR                       |
| hHBE1 qPCR Fwd    | GGCCAGAACTTCGGCAGTAA                                             | RT-qPCR                       |
| hHBE1 qPCR Rev    | AAACAACGAGGAGTCTGCCC                                             | RT-qPCR                       |
| hHBG1/2 qPCR Fwd  | ACTCGCTTCTGGAACGTCTG                                             | RT-qPCR                       |
| hHBG1/2 qPCR Rev  | CCTCTGGGTCCATGGGTAGA                                             | RT-qPCR                       |
| hALAS2 qPCR Fwd   | TACCCACCTGTCATTGTTCCG                                            | RT-qPCR                       |
| hALAS2 qPCR Rev   | GGACCGGAAAATGGCTTCCT                                             | RT-qPCR                       |
| hFECH qPCR Fwd    | ATCCAGCAGCTGGAGGGTCT                                             | RT-qPCR                       |
| hFECH qPCR Rev    | TGAATCTTGGGGGTTCCGGCG                                            | RT-qPCR                       |
| hGYPA qPCR Fwd    | CATTAAGTACCACTGAGGTGGC                                           | RT-qPCR                       |
| hGYPA qPCR Rev    | TGATGGGCAAGTTGTACCCT                                             | RT-qPCR                       |
| hKLF1 qPCR Fwd    | TGACTTCTCAAGTGGTGGC                                              | RT-qPCR                       |
| hKLF1 qPCR Rev    | GGTGAGGAGGAGATCCAGGT                                             | RT-qPCR                       |
| hGFI1B qPCR Fwd   | GCAGGAAGATGAACCGCTCT                                             | RT-qPCR                       |
| hGFI1B qPCR Rev   | CCAGGCACTGGTTTGGGAA                                              | RT-qPCR                       |
| hMYB qPCR Fwd     | GGGCAGAAATCGAAAGCTACT                                            | RT-qPCR                       |
| hMYB qPCR Rev     | GTTAACAGTGGGCTGGCCAG                                             | RT-qPCR                       |
| hCDKN1A qPCR Fwd  | TTTCTCTCGGCTCCCATGT                                              | RT-qPCR                       |
| hCDKN1A qPCR Rev  | GCTGTATATTAGCATTGTGGG                                            | RT-qPCR                       |
| HMG20A shRNA 1 S  | CTAGCAAGGCAAATCTCATAGGCAAGTACTAGTCTTGC<br>CTATGAGATTTGCCTTTTTTTG | shRNA Knockdown (EZ Tet pLKO) |

|                          |                                                                    |                                       |
|--------------------------|--------------------------------------------------------------------|---------------------------------------|
| HMG20A shRNA 1 A         | AATTCAAAAAAGGCAAACTCATAGGCAAGACTAGT<br>ACTTGCTATGAGATTTGCCTTG      | shRNA Knockdown (EZ Tet pLKO)         |
| HMG20B shRNA 1S          | CCGGAGCATCCCTTTAGCTTTCAATCTCGAGATTGAAA<br>GCTAAAGGGATGCTTTTTT      | shRNA Knockdown (Tet pLKO)            |
| HMG20B shRNA 1A          | AATTA AAAAAGCATCCCTTTAGCTTTCAATCTCGAGATT<br>GAAAGCTAAAGGGATGCT     | shRNA Knockdown (Tet pLKO)            |
| LSD1 shRNA 2S            | CCGGGCCTAGACATTA AACTGAATACTCGAGTATTCAG<br>TTTAATGTCTAGGCTTTTT     | shRNA Knockdown (Tet pLKO)            |
| LSD1 shRNA 2A            | AATTA AAAAGCTAGACATTA AACTGAATACTCGAGTA<br>TTCAGTTTAATGTCTAGGC     | shRNA Knockdown (Tet pLKO)            |
| LSD1 shRNA 3S            | CCGGGCTACATCTTACCTTAGTCATCTCGAGATGACTA<br>AGGTAAGATGTAGCTTTTT      | shRNA Knockdown (Tet pLKO)            |
| LSD1 shRNA 3A            | AATTA AAAAGCTACATCTTACCTTAGTCATCTCGAGAT<br>GACTAAGGTAAGATGTAGC     | shRNA Knockdown (Tet pLKO)            |
| GSE1 shRNA 2 S           | CTAGCGAACTCACCTTGACGTCAATGTACTAGTCATTG<br>ACGTCAAGGTGAGTCTTTTTG    | shRNA Knockdown (EZ Tet pLKO)         |
| GSE1 shRNA 2 A           | AATTC AAAAAGAACTCACCTTGACGTCAATGACTAGTA<br>CATTGACGTCAAGGTGAGTTTCG | shRNA Knockdown (EZ Tet pLKO)         |
| EZ Scramble S            | CTAGCCAACAAGATGAAGAGCACCAACTAGTTTGGT<br>GCTCTCATCTTGTGTTTTG        | shRNA Knockdown (EZ Tet pLKO)         |
| EZ Scramble A            | AATTC AAAAACAAGATGAAGAGCACCAACTAGT<br>ATTGGTGCTCTTCATCTTGTGG       | shRNA Knockdown (EZ Tet pLKO)         |
| Scramble shRNA S         | CCGGCAACAAGATGAAGAGCACCAACTCGAGTTGGTG<br>CTCTTCATCTTGTGTTTTT       | shRNA Knockdown (Tet pLKO)            |
| Scramble shRNA A         | AATTA AAAAACAAGATGAAGAGCACCAACTCGAGT<br>TGGTGCTCTTCATCTTGTG        | shRNA Knockdown (Tet pLKO)            |
| EcorR1 mHMG20B Fwd       | AAAAGAATTCAGCCACCATGTCCACGGTCCCGGCA                                | Cloning HMG20B into pcDNA3.1          |
| HMG20B no stop BamH1 Rev | AAAAGGATCCAGGTGCTCGCTGCTACCC                                       | Cloning HMG20B into pcDNA3.1          |
| Nhe1 mHMG20A Fwd         | TTTTGTAGCGCCACCATGGAGAGCTTGATGGCCAG                                | Cloning HMG20A into pcDNA3.1          |
| mHMG20A NoStop BamH1 Rev | TTTTGGATCCACGATCAAGCCTGTTCAACAAC                                   | Cloning HMG20A into pcDNA3.1          |
| Nhe1 mPHF21A Fwd         | AAAAGCTAGCGCCACCATGGAGTTGACAGACTCTACA                              | Cloning PHF21A into pcDNA3.1          |
| mPHF21A no stop Xho1 Rev | AAAACCTGAGATTTAGTCTCTTCCCTGGT                                      | Cloning PHF21A into pcDNA3.1          |
| mGF11B Nhe1 Fwd          | AAAGCTAGCGCCACCATGCCACGGTCTTTCTAGT                                 | Cloning GF11B into pcDNA3.1           |
| mGF11B BamH1 NoStop Rev  | AAAGGATCCTAAAATCCCCACTTGAGATTGTGTTGAC                              | Cloning GF11B into pcDNA3.1           |
| EcoR1 Gfi1b Fwd          | CCCCGAATTCGCCACCATGCCACGGTCTCTT                                    | Cloning GF11B forms inframe with Gal4 |
| Gfi1b SNAG Kpn1 Rev      | CCCCGGTACCCAGCTCATCACCTGTGCC                                       | Cloning GF11B forms inframe with Gal4 |
| Gfi1b D1C Kpn1 Rev       | CCCCGGTACCCGAGTGGATGAGCAGGTGGG                                     | Cloning GF11B forms inframe with Gal4 |
| BamH1-hGF11B-SNAG-Fwd    | AAAAGGATCCGGCTAGCGCCACCATGCCAC                                     | Cloning SNAG-BirA*:HA (pcDNA3.1)      |
| hGF11B-SNAG-bamH1-Rev    | AAAAGGATCTCCACACGGGGCTGTTGTTAGG                                    | Cloning SNAG-BirA*:HA (pcDNA3.1)      |
| Age1BamH1 with EcoRI S   | CCGGTCGAATTCGCCACCATGGCGGAGGGTCTGGAG<br>GCGGGAGTG                  | Cloning BirA*:HA Only (pcDNA3.1)      |
| Age1BamH1 with EcoRI A   | GATCCGGACCCGCTCCAGACCTCCGCCATGTTGGC<br>GAATTCGA                    | Cloning of BirA*:HA Only (pcDNA3.1)   |
| Not1-d1n-hGF11B-fwd      | AAAAGCGCGCCGCCACCATGCAGGAAGATGAACCGC<br>TC                         | Cloning dSNAG-BirA*:HA (pLVX-Tight)   |
| Not1 BioOnly Fwd         | AAAAGCGGCGCGTAGGAATTCGCCACCATGG                                    | Cloning BirA*:HA only (pLVX-Tight)    |
| Not1 Gfi1b Bio Fwd       | AAAAGCGGCGCGAATTCCTGCTAGCGCCACCATG                                 | Cloning GF11B-BirA*:HA (pLVX-Tight)   |
| Ha Mlu1 Rev              | AAAAACGCGTACTATGCGTAATCCGGTACATCG                                  | Cloning GF11B-BirA*:HA (pLVX-Tight)   |
| P2A-Gfi1b-3xFlag-Fwd     | CGATCGCCACCATGGCACGGTCTTTCTA                                       | Site-directed mutagenesis             |
| P2A-Gfi1b-3xFlag-Rev     | TAGAAAGGACCGTGCCATGGTGGCGATCG                                      | Site-directed mutagenesis             |
